# Supplementary material for: HSP90 regulates temperature-dependent seedling growth in Arabidopsis by stabilizing the auxin co-receptor F-box protein TIR1
Source: PubMed Central journal article supplement (PMC4728404; doi:10.1038/ncomms10269), 2016-01-05
Supplement: ncomms10269-s1.pdf [file ncomms10269-s1.pdf]

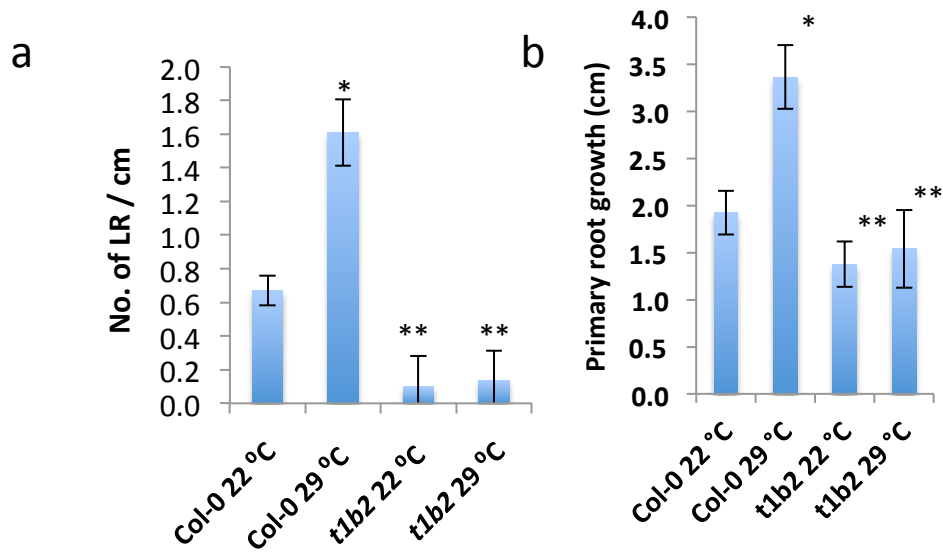

**Supplementary Fig 1. Role of TIR1 and AFB2 in seedling growth at elevated temperature.** (a) and (b) 5 day-old seedlings were maintained at 22 °C or shifted to 29 °C. The number of lateral roots (a) and length of primary roots (b) were measured after 4 more days. *t1b1* is *tir1-1 afb2-3*. Error bars are SD., n=12-15 seedlings, \* significant difference with 22°C, \*\*significant difference with Col-o (t-test  $P < 0.01$ ).

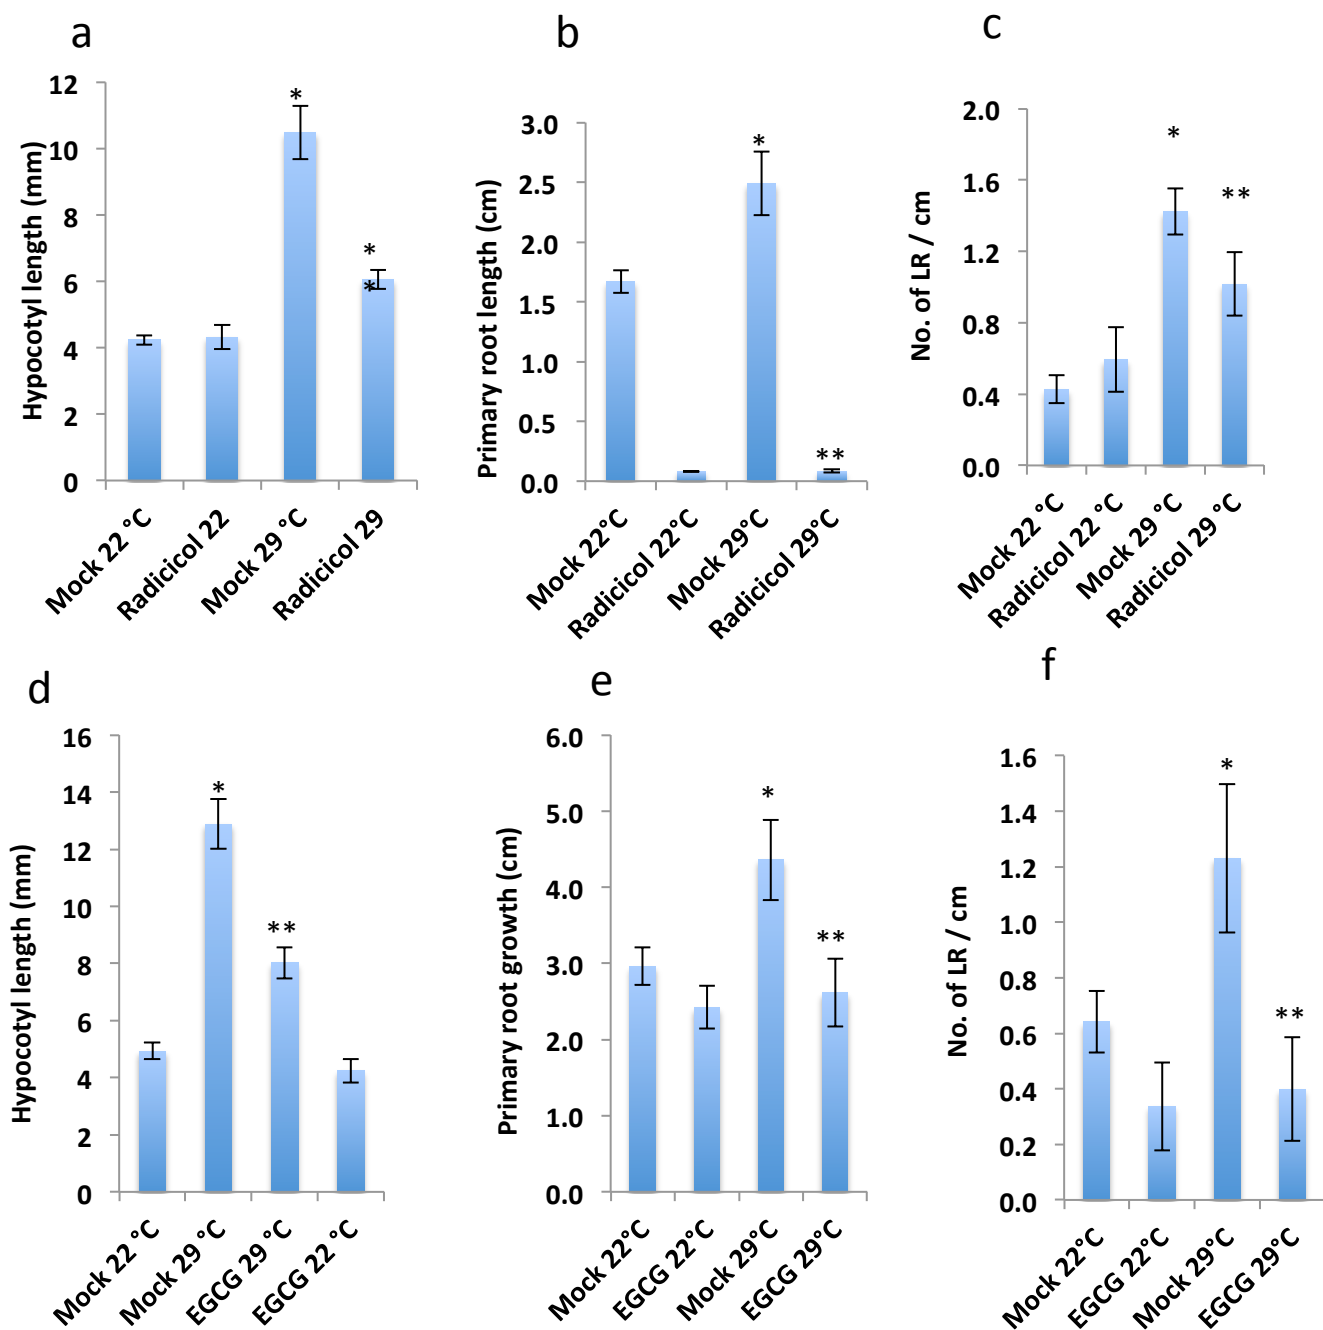

**Supplementary Fig 2 Effects of the HSP90 inhibitor Radiciol and EGCG on seedling growth at elevated temperature.** (a) and (d) 5 day-old seedlings were maintained at 22 °C or shifted to 29 °C in the presence or absence of 10  $\mu$ M Radiciol or 100  $\mu$ M EGCG and grown for another 4 days. (b) (c) (e) (f) 7 day-old seedlings were maintained at 22 °C or shifted to 29 °C in the presence or absence of 2  $\mu$ M Radiciol or 25  $\mu$ M EGCG and grown for another 6 days. Error bars are SD. N=10-14. \* significant difference with 22 °C, \*\*significant difference with Col-0 (t-test  $P < 0.01$ )

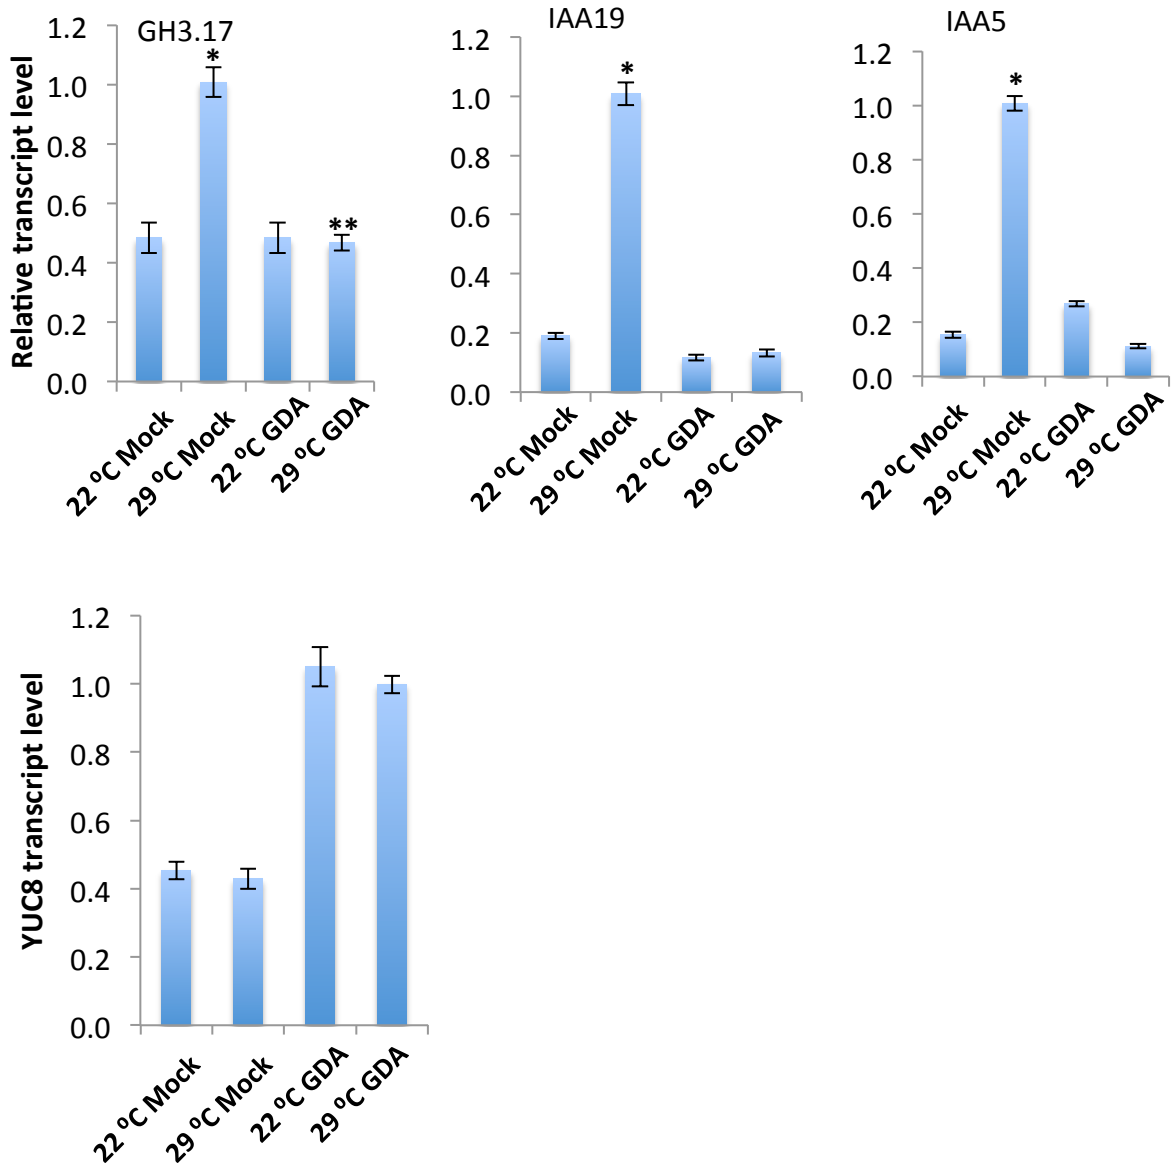

**Supplementary Fig 3. Effect of GDA (G) treatment on temperature-regulated gene expression.** 5-day old Col-0 seedlings were shifted to 29 °C. RNA levels were determined by qRT-PCR after 24 hours. Error bars are SD. N=3. \* significant difference with 22 °C, \*\* significant difference with mock

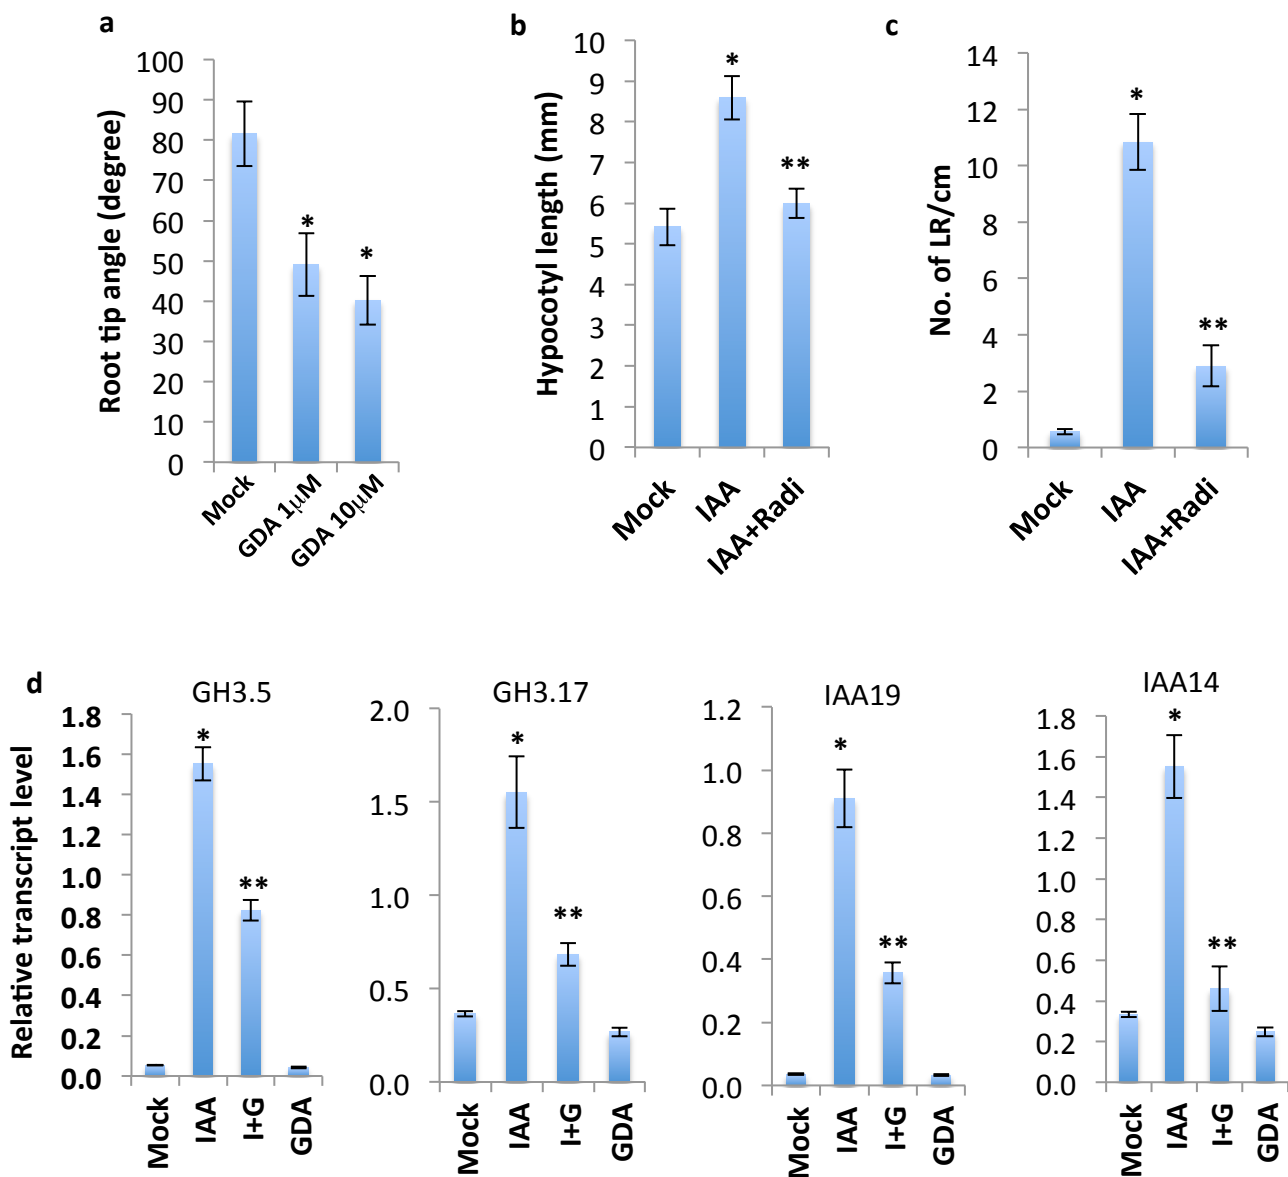

**Supplementary Fig 4. Inhibition of HSP90 activity suppresses response of seedlings to auxin.** (a) Root gravitropism was reduced after being treated with GDA. Seedlings were grown on  $\frac{1}{2}$  MS for 5 days, and then transferred to  $\frac{1}{2}$  MS plus GDA or DMSO (Mock). After growth of the seedlings for 2 hours in the vertical orientation, the plates were turned  $90^\circ$  and the root tip angle was measured after 24 hours. (b, c) Col-o seedlings were treated with IAA (2  $\mu$ M), Radicicol (Radi, 10  $\mu$ M) or both for 5 days. Error bars are SD. \* significantly different from mock, \*\* significantly different from IAA (t-test  $P < 0.01$ ) (d) Five day old Col-o seedlings were treated with IAA (2  $\mu$ M), GDA (10  $\mu$ M) or both for 24 hours. Transcript levels (*GAPC2* mRNA level were used for normalization) were determined by qRT-PCR. Error bars are SD., n=3. \* significant difference from mock, \*\* significant difference from IAA (t-test  $P < 0.01$ ).

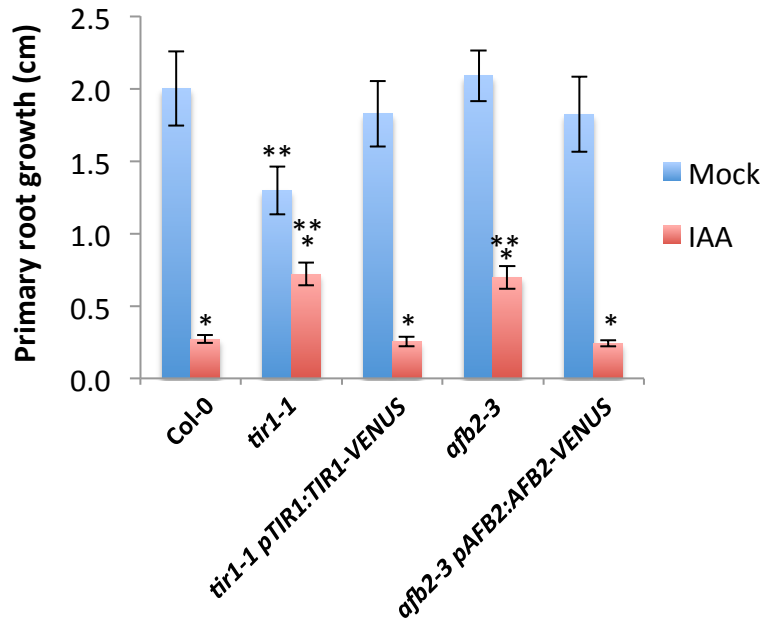

**Supplementary Fig 5. The *pTIR1:TIR1-VENUS* and *pAFB2:AFB2-VENUS* complement the *tir1-1* and *afb2-3* mutants, respectively.** 5-day old seedlings were treated with 0.02  $\mu$ M IAA or DMSO (Mock) for another 5 days before the length of the newly grown primary roots were measured. Error bars are SD., n=12-14 \* significant difference with mock, \*\* significant difference with Col-0.

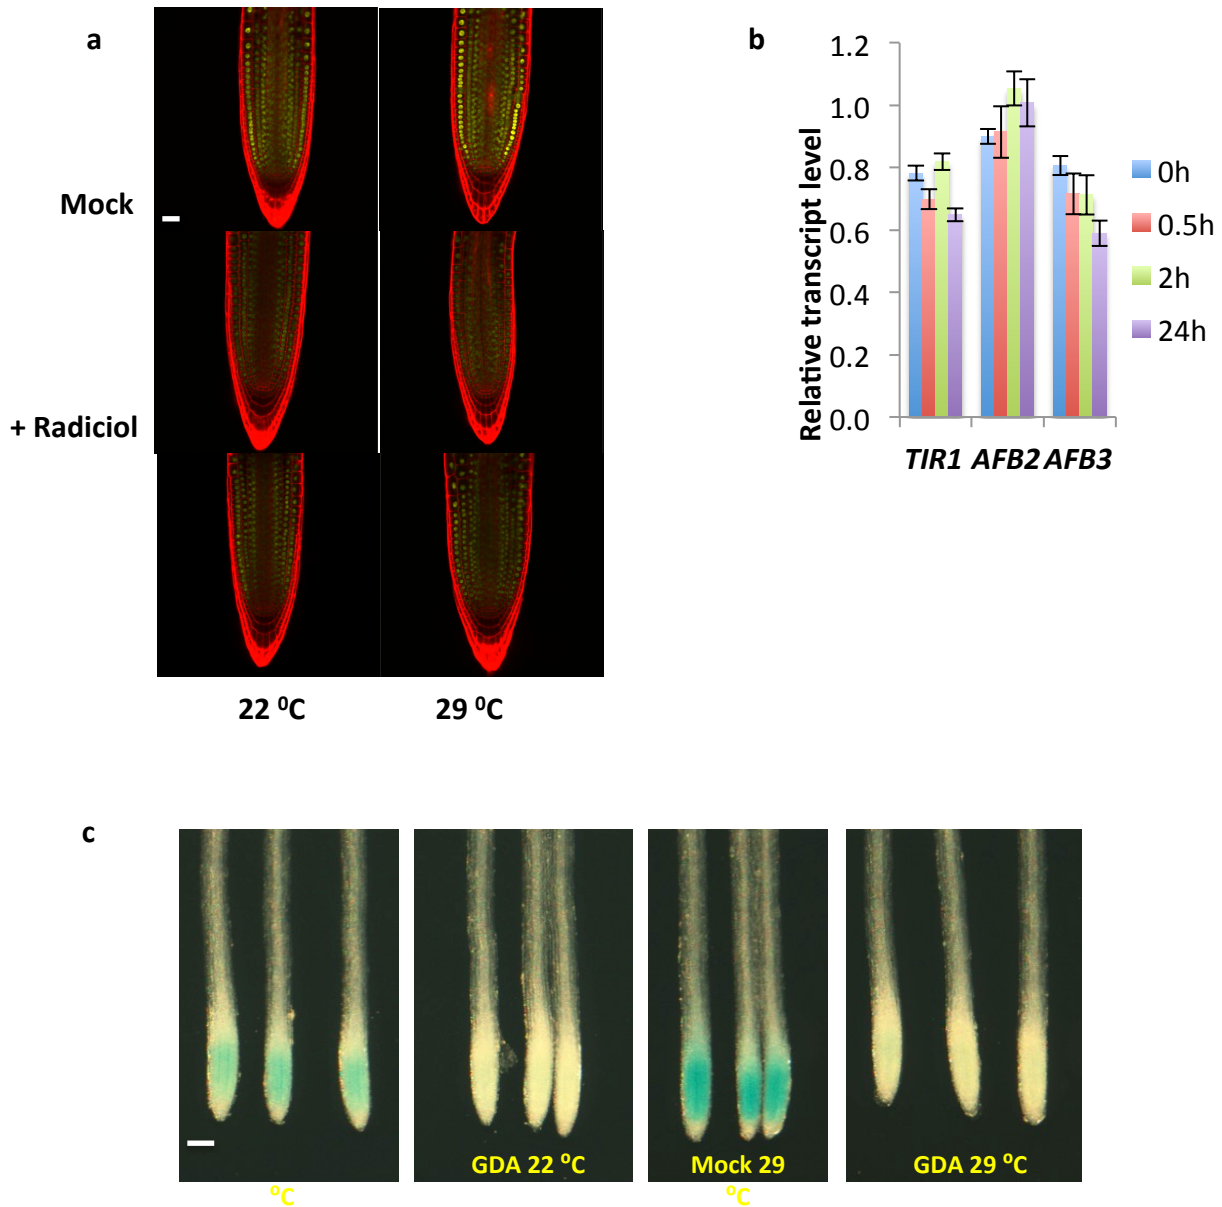

**Supplementary Fig 6. Effect of treatments on auxin receptor levels.** (a) 5 day-old *pTIR1:TIR1-GUS* seedlings were either maintained at 22 °C or shifted to 29 °C in the absence or presence of 100 mM GDA(G) and stained for GUS after 24 hours (b) 5 day-old Col-o seedlings were transferred to 29 °C and *TIR1/AFB* transcript levels were determined by qRT-PCR at various times. Error bars are SD. Scale bars represent 50 (a) and 200 (c)  $\mu$ m, respectively.

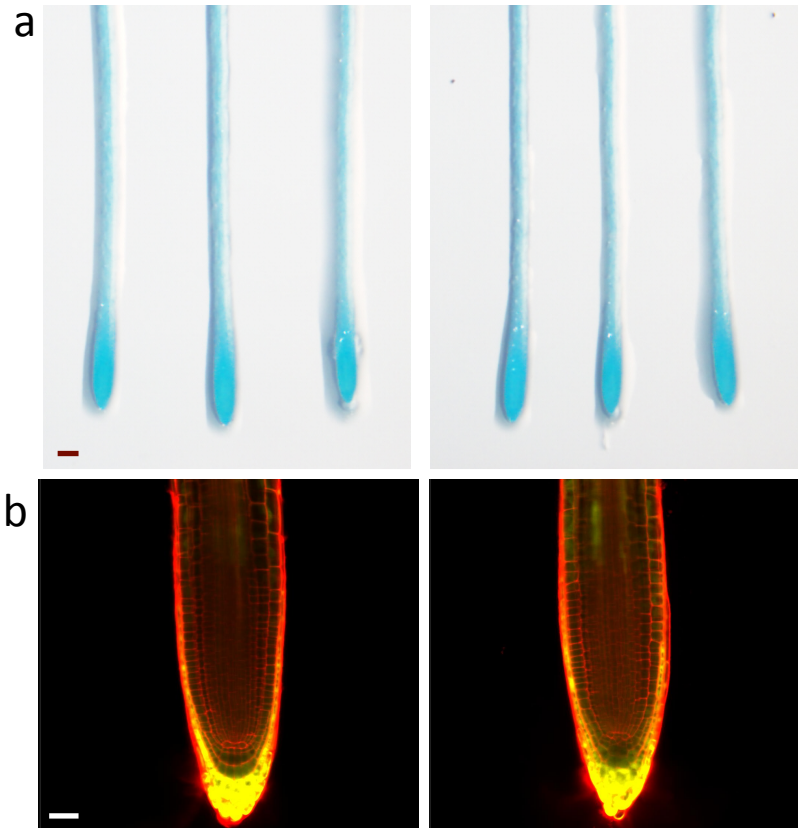

**Supplementary Figure 7.** (a) 5 day-old *pTIR1:TIR1-GUS* seedlings were treated with DMSO or 10 $\mu$ M GDA for 9 hours before staining for GUS. (b) 4 day-old *pUBQ10:CFP-VENUS* seedlings were treated with DMSO or 10  $\mu$ M GDA for 11 hours before imaging by confocal microscopy. Scale bar (a) 200  $\mu$ m; (b) 50  $\mu$ m

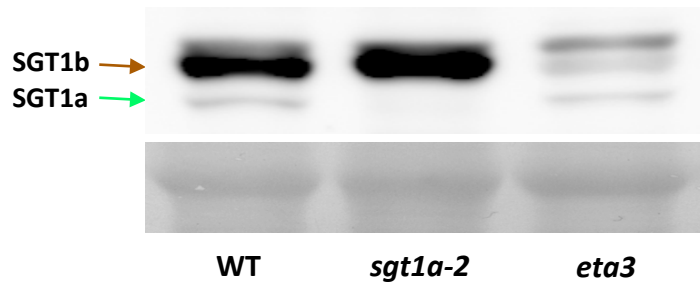

**Supplementary Fig 8. Characterization of SGT1 antibody.** Custom anti-SGT1 antibody recognizes both SGT1a and SGT1b in protein extracted from Col-0, *sgt1a-2* and *eta3* seedlings.



**Supplementary Fig 9. Original Blots**

**Figure 4e**

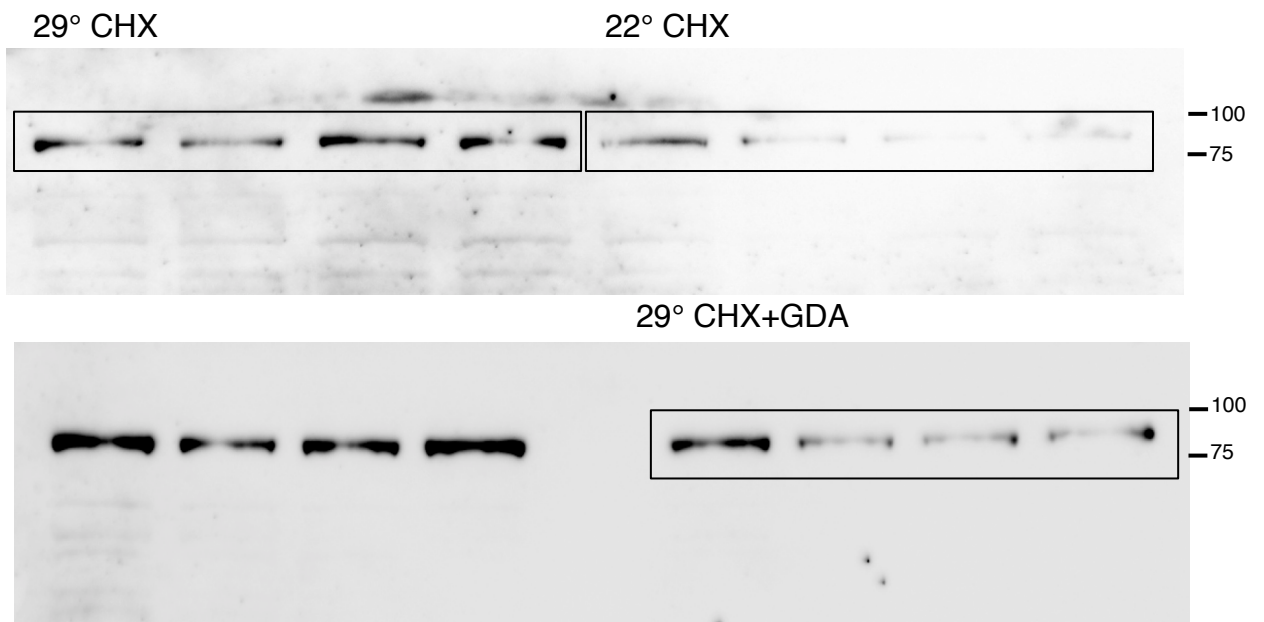

**Fig. 4g**

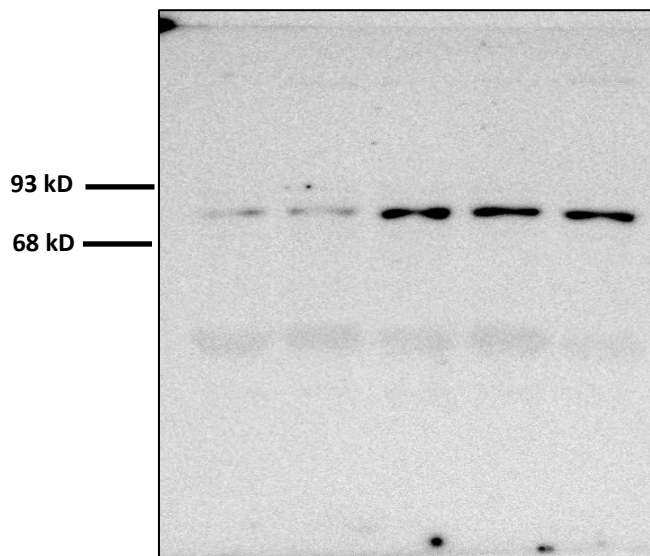

Figure 5a

IP  $\alpha$ -SGT1

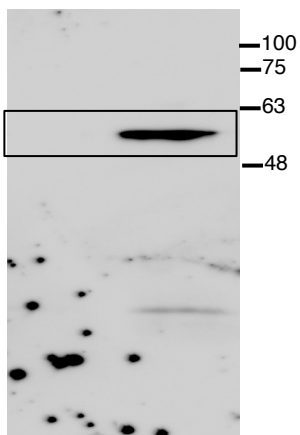

IP  $\alpha$ -HSP90

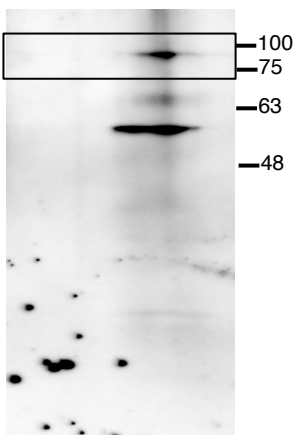

Input  $\alpha$ -Myc

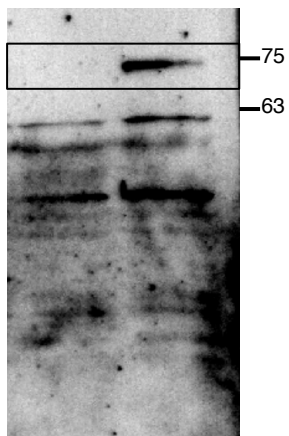

Input  $\alpha$ -SGT1

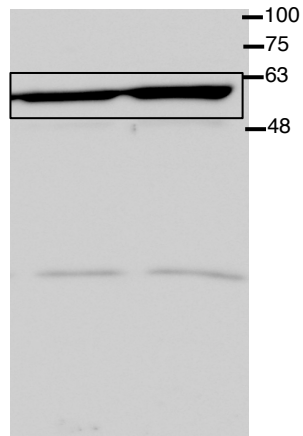

Input  $\alpha$ -HSP90

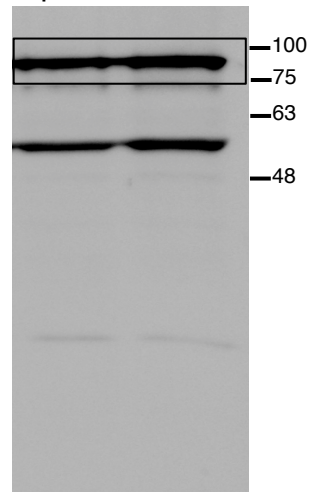

Figure 5b

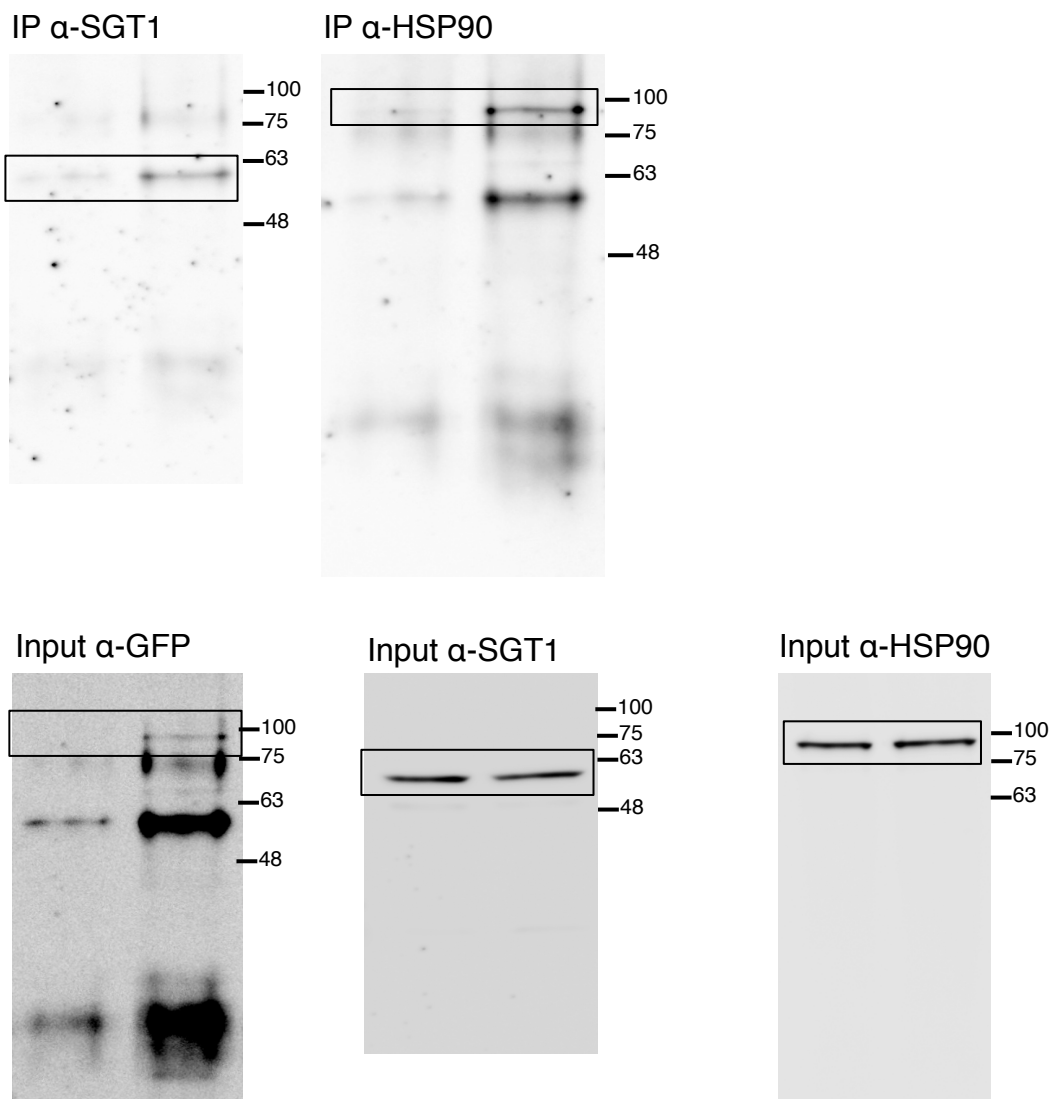

Figure 5c

PD  $\alpha$ -Myc

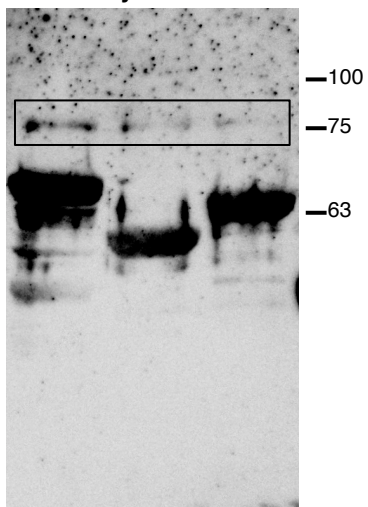

Input  $\alpha$ -Myc

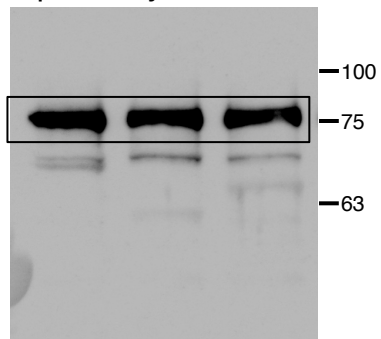

Input  $\alpha$ -GST

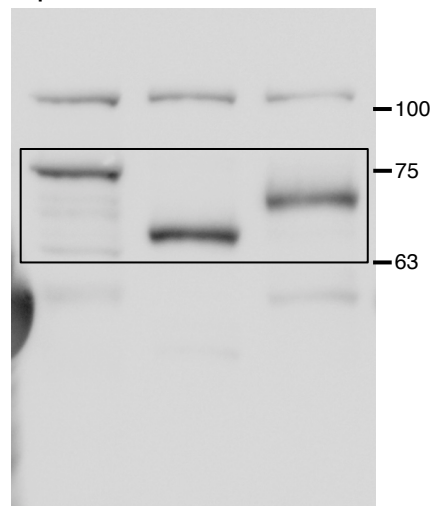

Figure 5d

PD  $\alpha$ -Myc

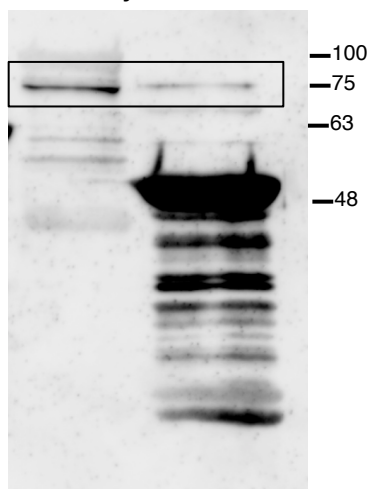

Input  $\alpha$ -Myc

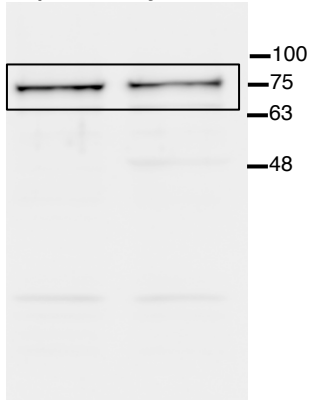

Input  $\alpha$ -GST

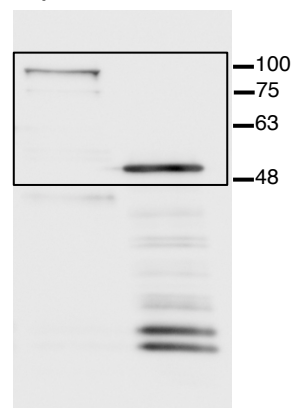

Figure 5k

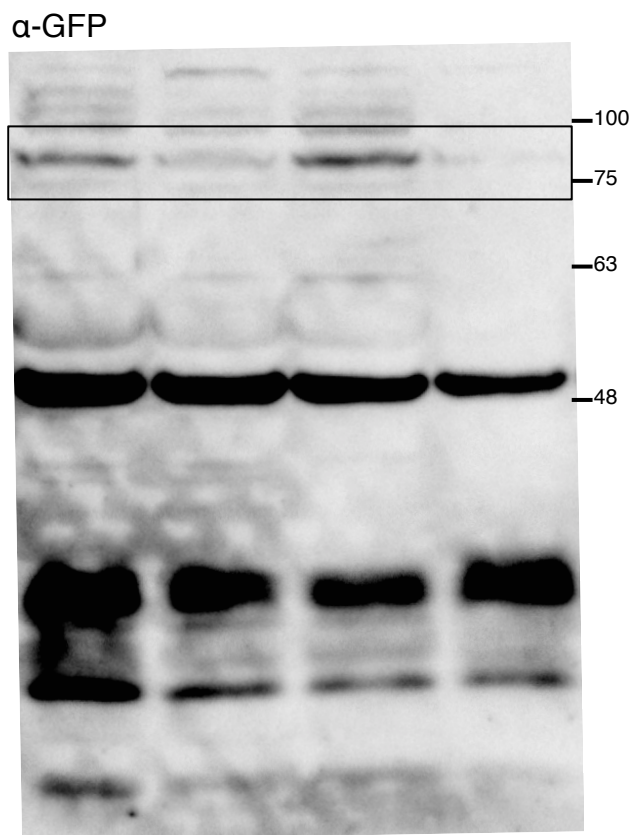

Blot for Suppl. Fig. 8

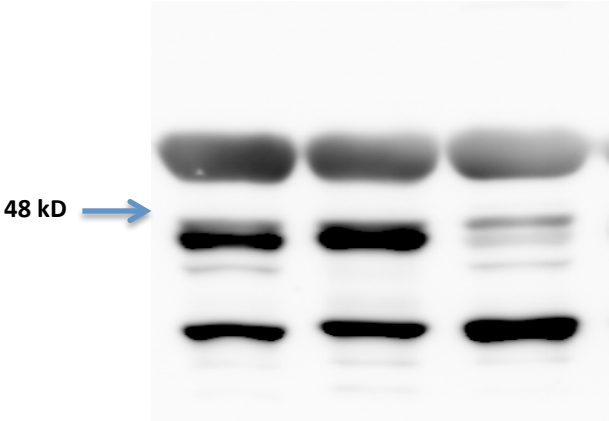

## Supplementary Table 1: Primers used in this study

|                                  |                                                       |
|----------------------------------|-------------------------------------------------------|
| <b>TIR1/AFB-VENUS lines</b>      |                                                       |
| <i>TIR1</i>                      |                                                       |
| EcoR1 pTIR1F                     | 5'- TCAGAATTCTAATATGACCACGTCGGCAAACGCAAG-3'           |
| TIR1 BamH1                       | 5'- CTAGGATCCTAATCCGTTAGTAGTAATGATTTGCCTGGA-3'        |
| BamH1 Venus                      | 5'- CTAGGATCCGTGAGCAAGGGCGAGGAGCT-3'                  |
| Venus Stop Not1                  | 5'- ATAGCGGCCGCTACTTGTACAGCTCGTCCATGCCGAGA-3'         |
| Not1 3'TIR1                      | 5'- TATGCGGCCGCGACAAAGAAACGAGGTACATTTTTTCATTAATCC-3'  |
| 3'TIR1 Not1                      | 5'- TTAGCGGCCGCGTGAGTTGTTTCTGATATTTGACTACTTGTGC-3'    |
| <i>AFB2</i>                      |                                                       |
| Kpn1 pAFB2F                      | 5'- ATCGGTACCGAATATTCCAATATATGCTTATGGTTGAATCAC-3'     |
| AFB2 EcoRV                       | 5'- TCGGATATCGAGAATCCACACAAATGGCGGCGCAT-3'            |
| EcoRV Venus                      | 5'- ATCGATATCGTGAGCAAGGGCGAGGAGCT-3'                  |
| Venus Stop Not1                  | 5'- ATAGCGGCCGCTACTTGTACAGCTCGTCCATGCCGAGA-3'         |
| Not1 3'AFB2                      | 5'- ATAGCGGCCGCGTCTTTTCAGACCAAACGGTTCTGAT-3'          |
| 3'AFB2 Not1                      | 5'- TAAGCGGCCGCGGATGACTTGCTGATCTTTTTACCTC-3'          |
| <i>AFB3</i>                      |                                                       |
| Kpn1 pAFB3F                      | 5'- ATAGGTACCAAGCAGCTGAAGAGGTTGAGAGTGG-3'             |
| AFB3 BamH1                       | 5'- TCAGGATCCAAGAATCCTAACATATGGTGGTGCATCTTTCTAGTCC-3' |
| BamH1 Venus                      | 5'- CTAGGATCCGTGAGCAAGGGCGAGGAGCT-3'                  |
| Venus Stop Not1                  | 5'- ATAGCGGCCGCTACTTGTACAGCTCGTCCATGCCGAGA-3'         |
| Not1 3'AFB3                      | 5'-TAGGCGGCCGCTCTCTTTCACCTTCATGTGTTTTTC-3'            |
| 3'AFB3 Not1                      | 5'-TCAGCGGCCGAGTTTCGTTTCGTAATCACTTCTCC-3'             |
| <b>Pull-down and BiFC assays</b> |                                                       |
| cTIR1_F                          | CACCATGCAGAAGCGAATAGCCTT                              |
| cTIR1_R                          | TTATAATCCGTTAGTAGTAATG                                |
| SGT1B_F                          | CACCATGGCCAAGGAATTAGCAGAGA                            |
| SGT1B_R                          | TCAATACTCCCACTTCTTGAGCT                               |
| SGT1B(-SGS)_R                    | TCACACTGGTCTCTGCGACAGCGCTGAT                          |
| HSP90.2CDS_F                     | AGATGGAGGAAGTCGACAAGGGTGGGCGCGCCGACCCAGCTT            |
| HSP90.2CDS_R                     | AAGCTGGGTGCGCGCGCCACCTTGTGCACTTCTCCATCT               |
| IAA7_F                           | CACCATGATCGGCCAACTTATGAACCT                           |
| IAA7_R                           | TCAAGATCTGTTCTTGCACTACT                               |
| <b>qRT-PCR</b>                   |                                                       |
| IAA5_F                           | CCGGAGAAGAACAAGTCTCG                                  |
| IAA5_R                           | AGCATCCGAACAGAATTTGC                                  |
| IAA14_F                          | GAAGCAGAGGAGGCAATGAG                                  |
| IAA14_R                          | CCCATGGTAAAGGAGCTGAA                                  |
| IAA19_F                          | GGTGACAACGCAATACGTTACCA                               |
| IAA19_R                          | CCCGGTAGCATCCGATCTTTTCA                               |
| TIR1_F                           | ATCGCTGCCACTTGCAGGAATC                                |
| TIR1_R                           | TGGCCACTAACGTCGTCACATC                                |
| AFB2_F                           | GCCGCTAATTGCAGGCATCTTC                                |
| AFB2_R                           | AGTCGTGCAAGTGTCTGGGAAAC                               |
| AFB3_F                           | AGGTTGAAGCGGATGGTTGTAACAG                             |
| AFB3_R                           | GCAAGTCCAGCTCACGAAGATGC                               |
| GH3.5_F                          | CCATCTCTGAGTTCCTCACAAGC                               |
| GH3.5_R                          | TCCTCTTCGATTGTTGGCATTAGC                              |
| GH3.17_F                         | ACGCAGACACGTCATCAATCCC                                |
| GH3.17_R                         | TGCTGTGACGTGGCTTTAGCTC                                |
| VENUS_F                          | ACGTAAACGGCCACAAGTTC                                  |
| VENUS_R                          | AAGTCGTGCTGCTTCATGTG                                  |
